# Supplementary material for: Extracellular Hsp90α Promotes Tumor Lymphangiogenesis and Lymph Node Metastasis in Breast Cancer
Source: MDPI journal article supplement (doi:10.3390/ijms22147747), 2021-07-20
Supplement: s1 [file s1]

**Table S1.** Participant distribution in the clinical trial

| <b>Group</b>                          | <b>Hospital</b>                                             | <b>No. of participants</b> |
|---------------------------------------|-------------------------------------------------------------|----------------------------|
| <b>Test cohort</b>                    |                                                             |                            |
| Healthy individuals                   | Zhejiang Province People's Hospital                         | 42                         |
| Patients with at-risk breast diseases | Fudan University Shanghai Cancer Center                     | 25                         |
| Breast cancer patients                | Tianjin Medical University Cancer<br>Institute and Hospital | 44                         |
| <b>Validation cohort</b>              |                                                             |                            |
| Healthy individuals                   | Zhejiang Province People's Hospital                         | 328                        |
| Patients with at-risk breast diseases | Fudan University Shanghai Cancer Center                     | 139                        |
| Breast cancer patients                | Fudan University Shanghai Cancer Center                     | 594                        |

**Table S2.** siRNA and lentiviral shRNA sequences of *Lrp1*

| <b>Name</b>         | <b>siRNA sequence (5'-3')</b> | <b>Lentiviral shRNA sequence (5'-3')</b> |
|---------------------|-------------------------------|------------------------------------------|
| <i>Lrp1</i> -RNAi-1 | GCGUGGUGUUCUGGUAUAATT         |                                          |
| <i>Lrp1</i> -RNAi-2 | GCCCAUUGGAUGAGUUUCATT         |                                          |
| <i>Lrp1</i> -RNAi-3 | CCACCUGCUAUGAGUUUAATT         | CCACCTGCTATGAGTTTAA                      |
| <i>Lrp1</i> -RNAi-4 | GUCGCUGUGUAUCCAACAUTT         | GTCGCTGTGTATCCAACAT                      |

**Table S3.** Primer sequences for qRT-PCR

| <b>Gene symbol</b> | <b>Forward primer (5'-3')</b> | <b>Reverse primer (5'-3')</b> |
|--------------------|-------------------------------|-------------------------------|
| <i>ACTB</i>        | CATGTACGTTGCTATCCAGGC         | CTCCTTAATGTCACGCACGAT         |
| <i>CCL24</i>       | GGAGTGGGTCCAGAGGTACAT         | CAGGTGGTTTGTTGCCAG            |
| <i>CXCL8</i>       | ACTGAGAGTGATTGAGAGTGGAC       | AACCCTCTGCACCCAGTTTTC         |
| <i>HDAC9</i>       | AGTAGAGAGGCATCGCAGAGA         | GGAGTGTCTTTCGTTGCTGAT         |
| <i>Cxcl1</i>       | CTGGGATTCACCTCAAGAACATC       | CAGGGTCAAGGCAAGCCTC           |
| <i>Cxcl2</i>       | CCAACCACCAGGCTACAGG           | GCGTCACACTCAAGCTCTG           |
| <i>Cxcl6</i>       | TCCAGCTCGCCATTCATGC           | TTGCGGCTATGACTGAGGAAG         |

**Table S4.** Concentration of plasma Hsp90 $\alpha$  in test cohort

| Group | No. | Median (IQR)<br>(ng/mL) | Mean (SD)<br>(ng/mL) |
|-------|-----|-------------------------|----------------------|
| HC    | 42  | 33.60 (25.43-39.65)     | 33.98 (13.44)        |
| AR    | 25  | 47.77 (39.17-62.08)     | 57.85 (29.94)        |
| HC+AR | 67  | 38.09 (28.02-47.96)     | 42.89 (23.95)        |
| BC    | 44  | 68.83 (51.15-96.93)     | 84.41 (54.77)        |

IQR, interquartile range; SD, standard deviation; HC, healthy control; AR, at-risk breast diseases (non-cancerous); HC+AR, non-cancer control; BC, breast cancer.

**Table S5.** Concentration of plasma Hsp90 $\alpha$  in validation cohort

| Group    | No. | Median (IQR)<br>(ng/mL) | Mean (SD)<br>(ng/mL) |
|----------|-----|-------------------------|----------------------|
| HC       | 328 | 32.24 (22.53-43.14)     | 35.06 (18.73)        |
| AR       | 139 | 55.17 (41.31-69.39)     | 62.81 (34.09)        |
| HC+AR    | 467 | 38.44 (24.78-53.95)     | 43.32 (27.41)        |
| BC       | 594 | 66.50 (49.81-93.25)     | 81.87 (77.01)        |
| Early-BC | 524 | 64.53 (48.51-87.28)     | 72.11 (36.50)        |
| Late-BC  | 70  | 100.70 (64.98-152.10)   | 154.90 (186.40)      |

IQR, interquartile range; SD, standard deviation; HC, healthy control; AR, non-cancerous breast diseases; HC+AR, non-cancer control; BC, breast cancer; Early-BC, early-stage (stage I and II) breast cancer, Late-BC, late-stage (stage III and IV) breast cancer.

**Table S6.** Plasma Hsp90 $\alpha$  concentration of breast cancer patients in different clinical stages of regional lymph node metastasis

| Group       | No. | Median (IQR)<br>(ng/mL) | Mean (SD)<br>(ng/mL) |
|-------------|-----|-------------------------|----------------------|
| HC+AR       | 467 | 38.44 (24.78-53.95)     | 43.32 (27.41)        |
| cN0         | 393 | 64.13 (47.68-85.92)     | 70.74 (35.29)        |
| cN1         | 147 | 69.70 (51.73-93.88)     | 80.94 (46.98)        |
| cN2         | 13  | 88.00 (72.42-118.90)    | 98.05 (47.30)        |
| cN3         | 12  | 88.29 (59.55-147.40)    | 115.44 (81.88)       |
| cN1+cN2+cN3 | 172 | 71.63 (52.11-97.65)     | 84.64 (50.64)        |

IQR, interquartile range; SD, standard deviation; HC+AR, non-cancer control. cN0 stage is defined as no regional lymph node metastases (by imaging or clinical examination). cN1 stage is defined as metastases to movable ipsilateral level I and II axillary lymph node(s). cN2 stage is defined as metastases in ipsilateral level I and II axillary lymph nodes that are clinically fixed or matted; or in ipsilateral internal mammary lymph nodes in the absence of axillary lymph node metastases. cN3 stage is defined as metastases in ipsilateral infraclavicular (level III axillary) lymph node(s) with or without level I and II axillary lymph node involvement; or in ipsilateral internal mammary lymph node(s) with level I and II axillary lymph node metastases; or metastases in ipsilateral supraclavicular lymph node(s) with or without axillary or internal mammary lymph node involvement. The degree of regional lymph node metastasis follows: cN0 < cN1 < cN2 < cN3. cN1+cN2+cN3 group represents patients with regional lymph node metastasis, including cN1, cN2 and cN3 categories.

**Table S7.** Detailed information of the top 50 down-regulated or up-regulated DEGs

| Gene symbol     | log <sub>2</sub> (fold change) | P-value | Gene symbol  | log <sub>2</sub> (fold change) | P-value |
|-----------------|--------------------------------|---------|--------------|--------------------------------|---------|
| PHOSPHO2-KLHL23 | -2.82                          | 0.04    | LOC101928589 | 1.98                           | 0.05    |
| LOC100996911    | -1.23                          | 0.03    | PCDHB5       | 0.95                           | 0.02    |
| TMEM45A         | -1.00                          | 0.03    | FAM72A       | 0.75                           | 0.02    |
| HIST1H3E        | -0.97                          | 0.02    | CA12         | 0.70                           | 0.01    |
| BCL2L10         | -0.94                          | 0.02    | FUOM         | 0.67                           | 0.00    |
| TMEM189-UBE2V1  | -0.87                          | 0.04    | GP1BB        | 0.65                           | 0.04    |
| DNASE1L3        | -0.78                          | 0.03    | TBC1D3       | 0.65                           | 0.02    |
| HERC5           | -0.77                          | 0.03    | EFCAB8       | 0.63                           | 0.03    |
| CBX8            | -0.76                          | 0.02    | NRROS        | 0.60                           | 0.00    |
| HSF4            | -0.76                          | 0.01    | RGS20        | 0.60                           | 0.04    |
| GOLGA8T         | -0.72                          | 0.02    | CCDC157      | 0.59                           | 0.03    |
| CLEC12B         | -0.70                          | 0.01    | ZNF662       | 0.55                           | 0.01    |
| PNPLA3          | -0.69                          | 0.02    | PTPRCAP      | 0.52                           | 0.00    |
| DRAXIN          | -0.67                          | 0.01    | LOC107986805 | 0.51                           | 0.00    |
| TNIP3           | -0.66                          | 0.04    | RELL2        | 0.50                           | 0.01    |
| POPDC3          | -0.66                          | 0.03    | HYKK         | 0.49                           | 0.03    |
| LOC105373132    | -0.63                          | 0.04    | SYCE1L       | 0.48                           | 0.03    |
| ZNF485          | -0.62                          | 0.03    | ARHGEF19     | 0.48                           | 0.03    |
| ZNF382          | -0.62                          | 0.00    | MLANA        | 0.46                           | 0.03    |
| IFIT2           | -0.61                          | 0.01    | LLGL2        | 0.44                           | 0.04    |
| EPSTI1          | -0.59                          | 0.04    | LOC100505549 | 0.43                           | 0.04    |
| ZNF441          | -0.58                          | 0.05    | MFSD13A      | 0.42                           | 0.03    |
| ERCC6L2         | -0.58                          | 0.00    | NUDT17       | 0.41                           | 0.02    |
| ZFP2            | -0.56                          | 0.02    | USP44        | 0.41                           | 0.03    |
| ANKHD1          | -0.55                          | 0.02    | PRELID3A     | 0.41                           | 0.04    |
| SERHL2          | -0.53                          | 0.02    | UCP3         | 0.40                           | 0.02    |
| PCDHB2          | -0.52                          | 0.04    | HOOK2        | 0.40                           | 0.01    |
| CCL7            | -0.51                          | 0.02    | ZNF575       | 0.39                           | 0.05    |
| ZNF121          | -0.51                          | 0.04    | RILP         | 0.39                           | 0.03    |
| TIGD6           | -0.48                          | 0.04    | SAA2         | 0.38                           | 0.04    |
| SLC41A2         | -0.47                          | 0.04    | ZSWIM9       | 0.38                           | 0.04    |
| WDR83           | -0.47                          | 0.01    | GALM         | 0.38                           | 0.01    |
| KIAA1328        | -0.47                          | 0.04    | STX1A        | 0.38                           | 0.01    |
| VAMP4           | -0.45                          | 0.01    | NR2F1        | 0.38                           | 0.02    |

**Table S7** (continued)

| Gene symbol  | log <sub>2</sub> (fold change) | <i>P</i> -value | Gene symbol  | log <sub>2</sub> (fold change) | <i>P</i> -value |
|--------------|--------------------------------|-----------------|--------------|--------------------------------|-----------------|
| C22orf23     | -0.44                          | 0.04            | CHAC2        | 0.36                           | 0.00            |
| LOC100506248 | -0.43                          | 0.05            | SOCS2        | 0.36                           | 0.01            |
| SYT15        | -0.42                          | 0.04            | SGK494       | 0.35                           | 0.03            |
| BFSP1        | -0.41                          | 0.00            | THG1L        | 0.35                           | 0.03            |
| <b>CXCL8</b> | <b>-0.41</b>                   | <b>0.04</b>     | BNIP1        | 0.34                           | 0.05            |
| EIF4E3       | -0.40                          | 0.01            | ECHDC2       | 0.33                           | 0.03            |
| GSAP         | -0.40                          | 0.05            | DFFB         | 0.32                           | 0.03            |
| C12orf66     | -0.40                          | 0.05            | PMM1         | 0.31                           | 0.01            |
| LNPEP        | -0.40                          | 0.02            | LOC100652901 | 0.30                           | 0.05            |
| CRYBG3       | -0.40                          | 0.01            | ITPA         | 0.29                           | 0.05            |
| ZNF846       | -0.39                          | 0.02            | NEK5         | 0.29                           | 0.02            |
| <b>CCL24</b> | <b>-0.39</b>                   | <b>0.05</b>     | LOC107984026 | 0.29                           | 0.03            |
| ABHD12B      | -0.38                          | 0.03            | ZNHIT2       | 0.29                           | 0.01            |
| TPBG         | -0.37                          | 0.05            | PILRB        | 0.29                           | 0.03            |
| PPP1R12B     | -0.37                          | 0.05            | AVPI1        | 0.28                           | 0.05            |
| PLLP         | -0.37                          | 0.04            | LIPE         | 0.28                           | 0.00            |
